# Supplementary material for: Ag, Ti dual-cation substitution in Cu2ZnSn(S,Se)4 induced growth promotion and defect suppression for high-efficiency solar cells
Source: Royal Society of Chemistry journal article supplement (doi:10.1039/d2ta05909f), 2022-01-01
Supplement: d2ta05909f1.pdf [file d2ta05909f1.pdf]

## Supporting Information

### Ag, Ti Dual-Cation Substitution in $\text{Cu}_2\text{ZnSn}(\text{S,Se})_4$ Induced Growth

### Promotion and Defects Suppression for High-Efficiency Solar Cells

Xing-Ye Chen<sup>a</sup>, Muhammad Ishaq<sup>a</sup>, Ahmad Nafees<sup>a</sup>, Rong Tang<sup>a</sup>, Zhuang-Hao Zheng<sup>a</sup>,  
Ju-Guang Hu<sup>a</sup>, Zheng-Hua Su<sup>a</sup>, Ping Fan<sup>a</sup>, Guang-Xing Liang<sup>a,\*</sup> and Shuo Chen<sup>a,\*</sup>

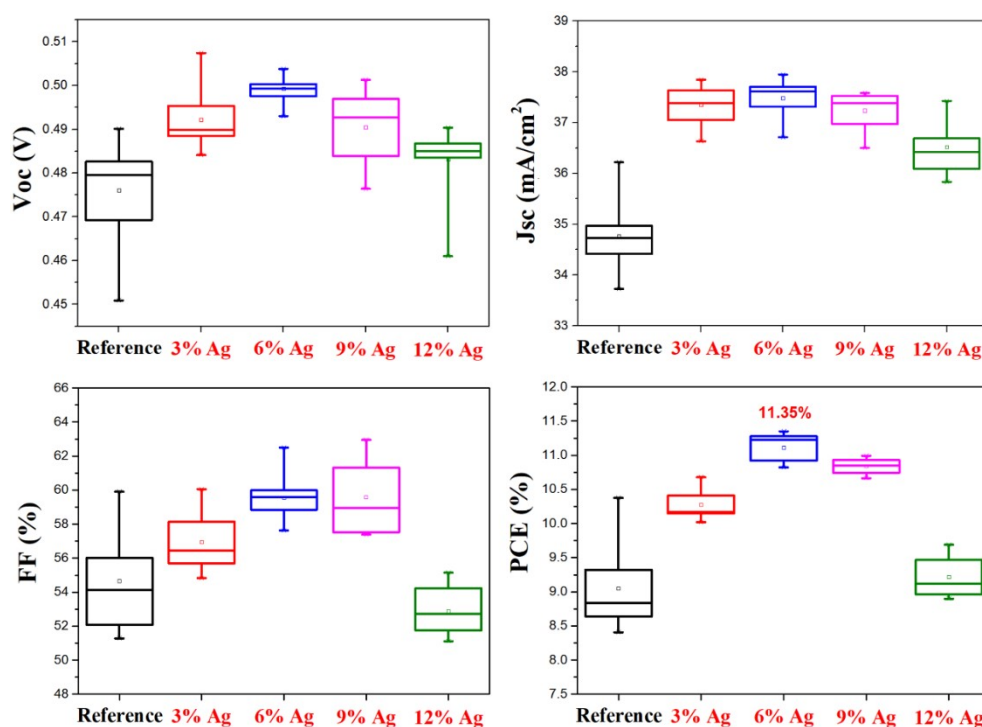

**Figure S1.** The statistic photovoltaic performances ( $V_{oc}$ ,  $J_{sc}$ , FF and PCE) of CZTSSe-based solar cells with various Ag substitution concentration.

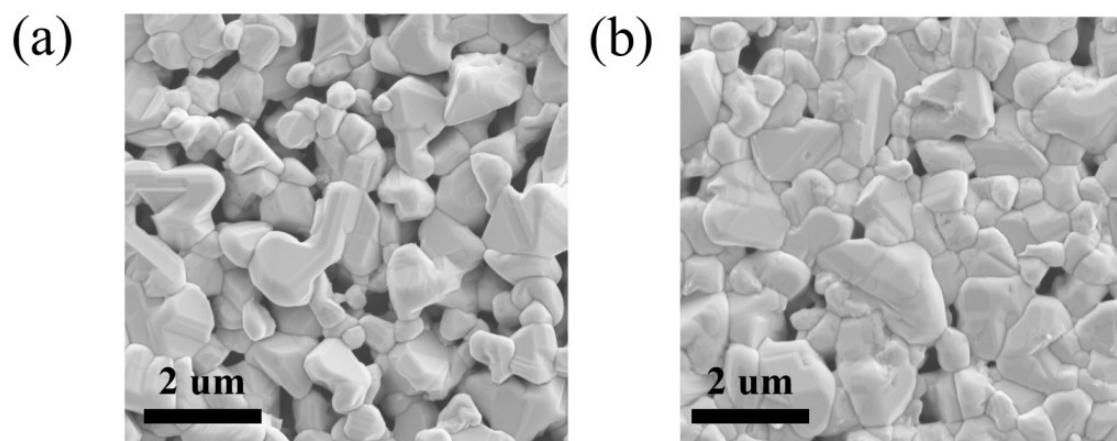

**Figure S2.** SEM images of (a) Pristine, and (b) Ti substituted CZTSSe thin films.

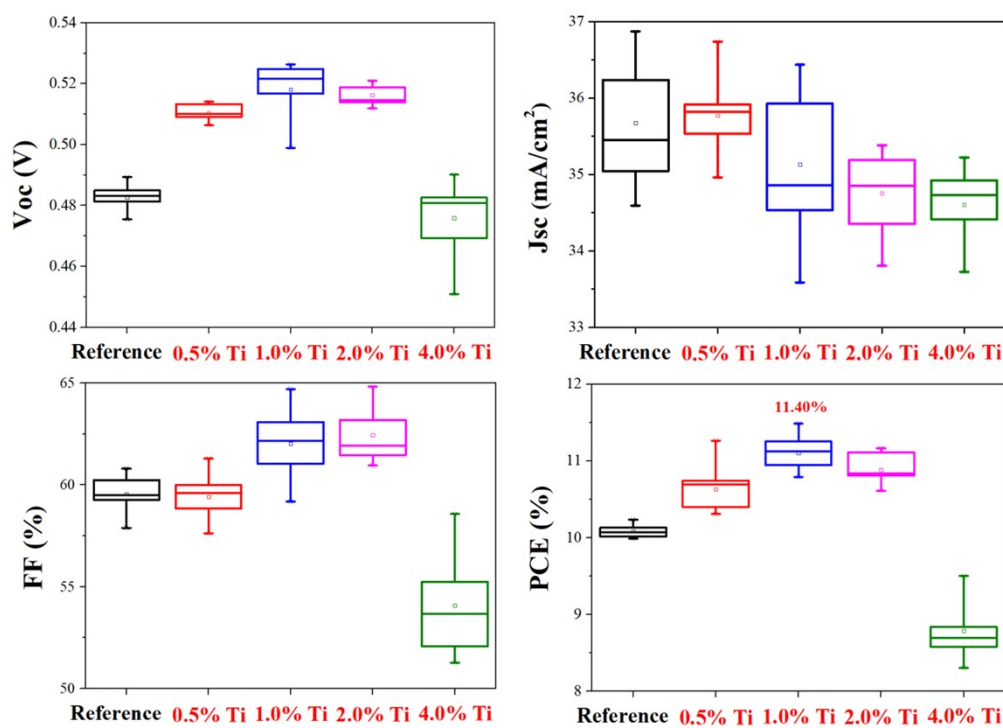

**Figure S3.** The statistic photovoltaic performances ( $V_{OC}$ ,  $J_{SC}$ , FF and PCE) of CZTSSe-based solar cells with various Ti substitution concentration.

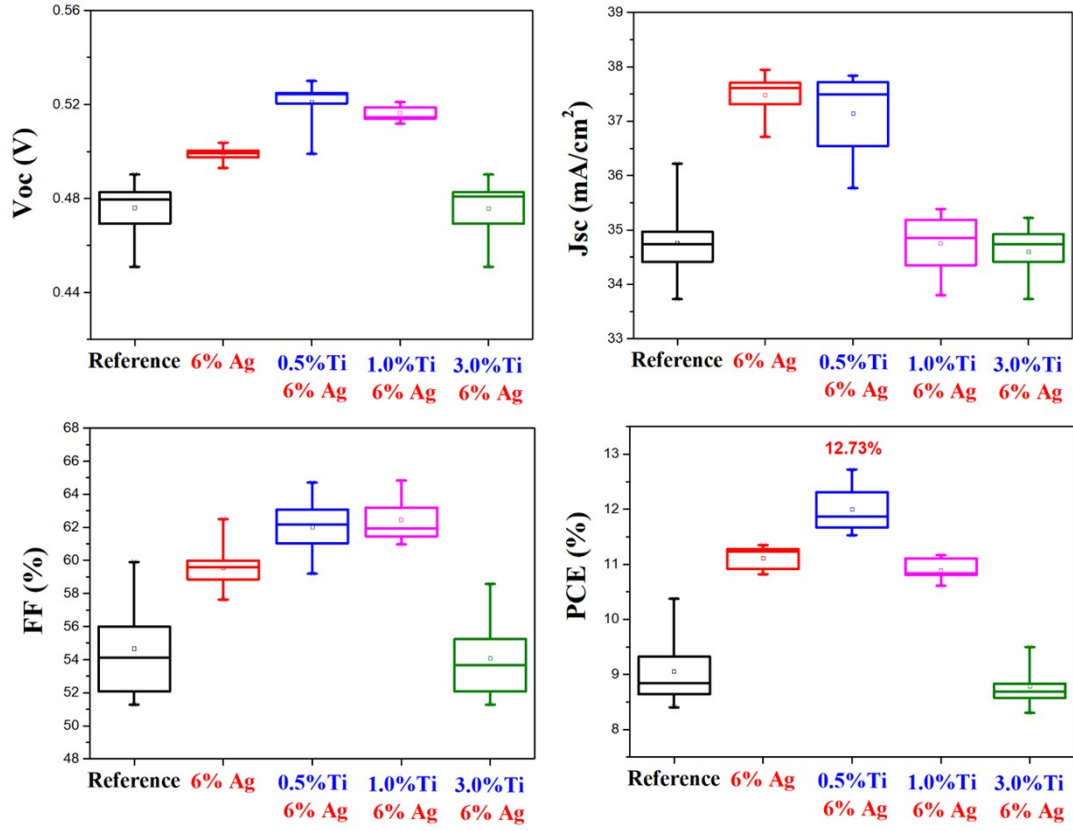

**Figure S4.** The statistic photovoltaic performances ( $V_{OC}$ ,  $J_{SC}$ , FF and PCE) of 6%-Ag-substituted CZTSSe solar cells and various Ti substitution concentration.

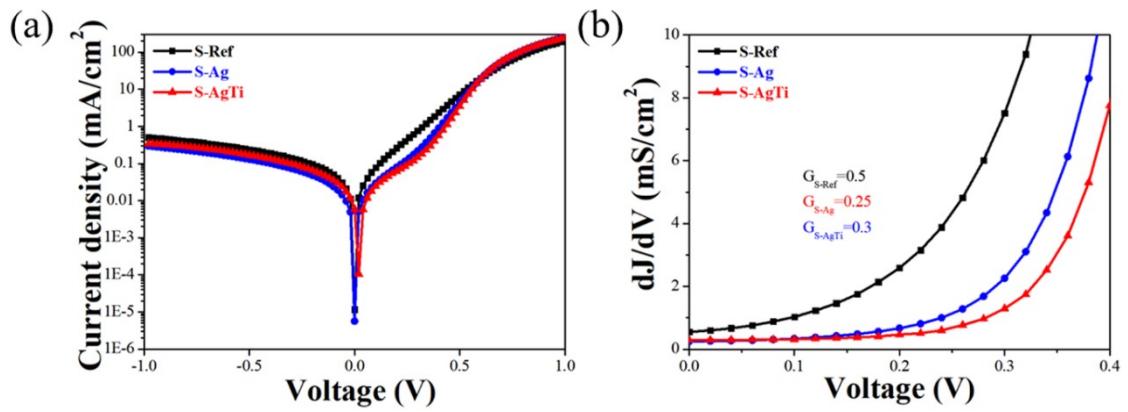

**Figure S5.** (a) Dark  $J$ - $V$  curves, and (b) Shunt conductance  $G$  characterizations of S-Ref, S-Ag and S-AgTi devices.

**Table S1.** Fitting results of Sn 3d peaks of S-Ref, S-Ag and S-AgTi thin films

| Device | Peak intensity ( $3d_{5/2}$ ) |                  |        | Peak intensity ( $3d_{3/2}$ ) |                  |          |        |
|--------|-------------------------------|------------------|--------|-------------------------------|------------------|----------|--------|
|        | Sn <sup>4+</sup>              | Sn <sup>2+</sup> | total  | Sn <sup>4+</sup>              | Sn <sup>2+</sup> | Zn-Auger | total  |
| S-Ref  | 135178                        | 653169           | 788347 | 276652                        | 327905           | 140982   | 745539 |
| S-Ag   | 99822                         | 624975           | 724797 | 228980                        | 341544           | 109643   | 680167 |
| S-AgTi | 46474                         | 509831           | 556305 | 129929                        | 369864           | 59379    | 559172 |

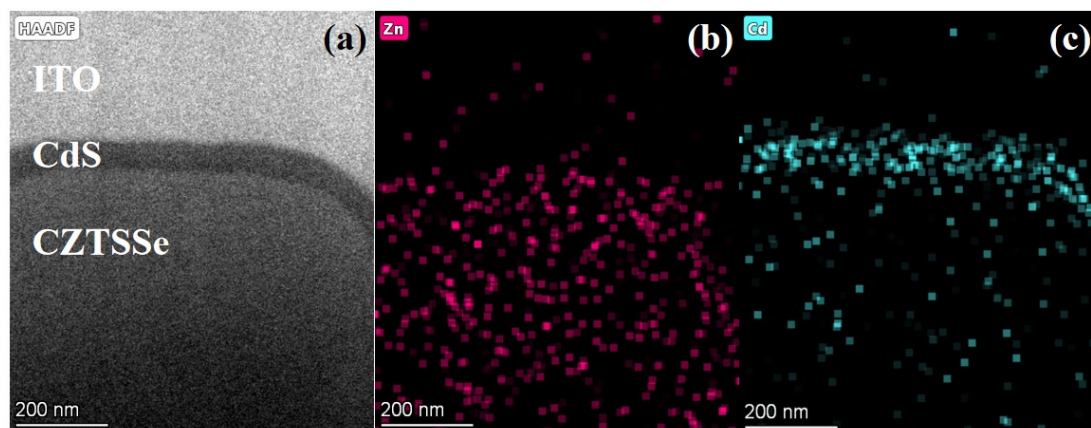

**Figure S6.** TEM image and TEM-coupled element mapping results for the champion S-AgTi device: (a) Cross-sectional TEM image, (b) Zn, and (c) Cd elemental mapping images.

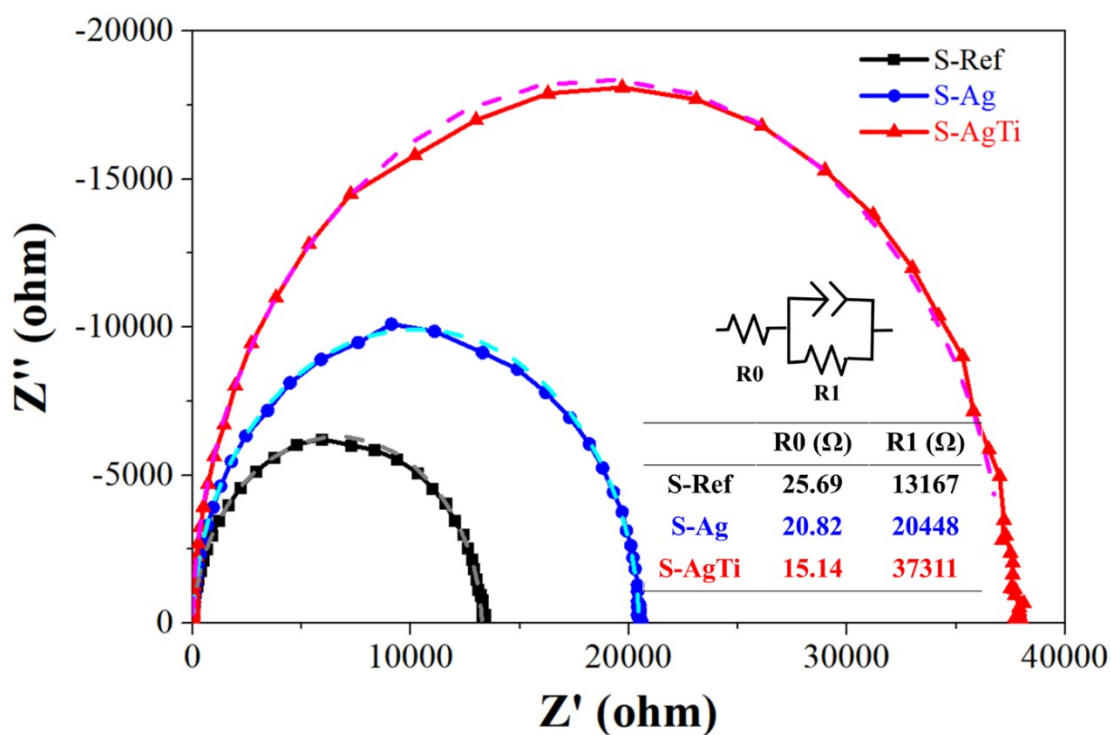

**Figure S7.** EIS Nyquist plots of S-Ref, S-Ag, and S-AgTi devices. Inset is the equivalent circuit and the corresponding parameters.

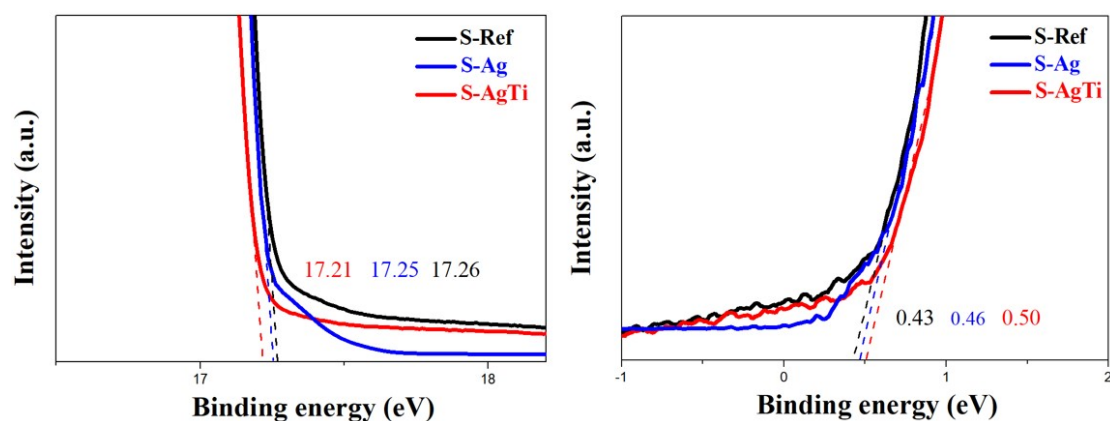

**Figure S8.** UPS characterizations: secondary electron cut-off (SEC) edge and valence band (VB) position of S-Ref, S-Ag and S-AgTi thin films.
